# Supplementary material for: A Direct Comparison of IV and ICV Delivery Methods for Gene Replacement Therapy in a Mouse Model of SMARD1
Source: PubMed Central journal article supplement — Mol Ther Methods Clin Dev. 2018 Aug 17;10:348–60. doi: 10.1016/j.omtm.2018.08.005 (PMC6127875; doi:10.1016/j.omtm.2018.08.005), 2018-08-17
Supplement: mmc1.pdf [file mmc1.pdf]

**OMTM, Volume 10**

**Supplemental Information**

**A Direct Comparison of IV and ICV Delivery**

**Methods for Gene Replacement Therapy**

**in a Mouse Model of SMARD1**

**Monir Shababi, Eric Villalón, Kevin A. Kaifer, Vince DeMarco, and Christian L. Lorson**

**A**

Collagen III/I in arterial wall

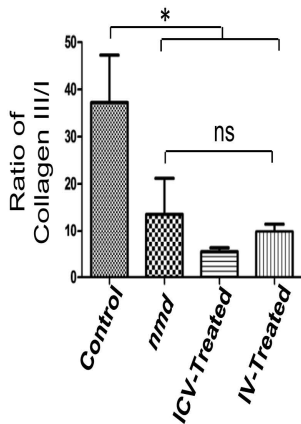**B**

CTGF in cardiomyocytes

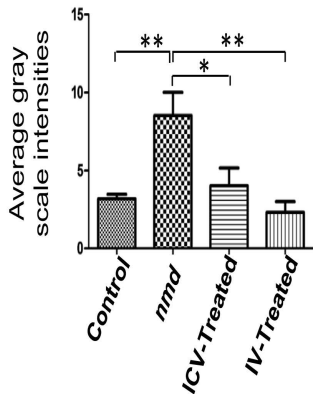**C**TGF $\beta$ 1 in cardiomyocytes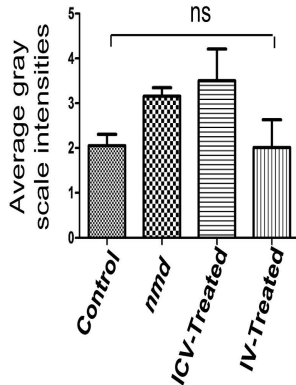**D**TGF $\beta$ 1 in arterial wall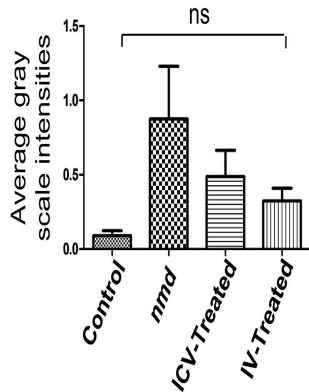

A

Left Atrial Diameter

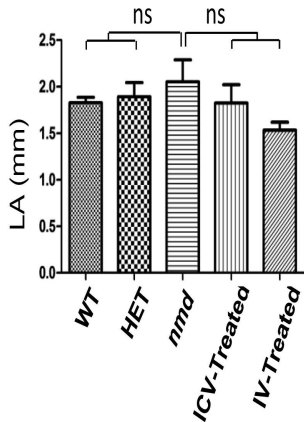

B

Aorta Diameter

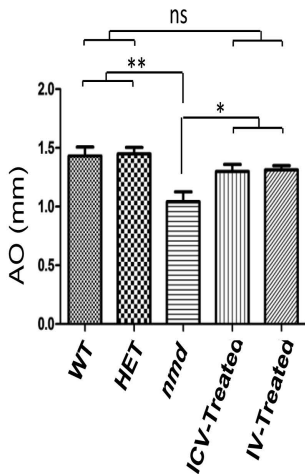

C

Myocardial performance index

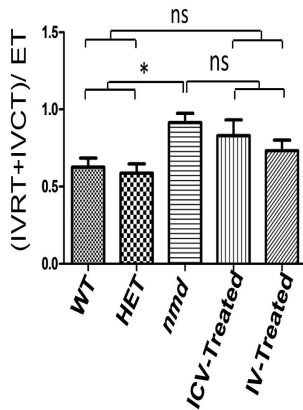

D

Heart Rate

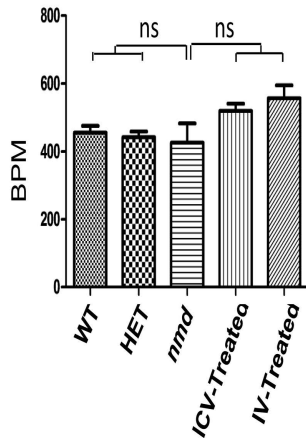

# Heart Extract (PND 14)

HEK293/  
IGHMBP2

Non-Transgenic

Transgenic

110 →  
KDa

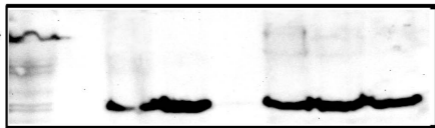

Anti-IGHMBP2

← 55-60 KDa

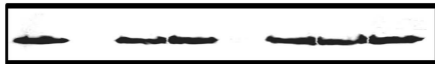

Anti-Tubulin

Control

WT

HET

HET

HET

*nmd*

**Figure S1. Expression levels of ECM proteins and growth factors in Cardiomyocytes and arteries of *nmd* heart.** (A) Ratio of collagen III/I in arteries (one-way ANOVA unaffected control vs. *nmd*, IV, and ICV treated,  $P < 0.05$ ); (B) Expression of CTGF in cardiomyocytes (one-way ANOVA IV-treated vs. *nmd*,  $P < 0.01$ ; ICV-treated vs. *nmd*,  $P < 0.05$ ) (C, D) expression of TGF $\beta$  in cardiomyocytes (C) and arteries (D). The levels of TGF $\beta$  are not significantly different between the cohorts.

**Figure S2. Functional parameters of *nmd* heart.** (A) Left atrial diameter; (B) Aorta diameter; (C) Myocardial performance index (one-way ANOVA controls vs. *nmd*,  $P < 0.05$ ); (D) Heart rate. BPM (beat per minute).

**Figure S3. Expression level of IGHMBP2 in cardiac rescue transgenic *nmd*.** Western blot with the heart extracts of non-transgenic and cardiac rescue transgenic *nmd* detects a low expression of IGHMBP2 in transgenic heart. HEK 293 cells transfected with IGHMBP2 construct was used as size control and anti-tubulin was used as loading control.
